# Supplementary material
Source: MDPI journal article supplement (https://www.mdpi.com/2304-6740/11/10/406)
Supplement: s1 [file s1]

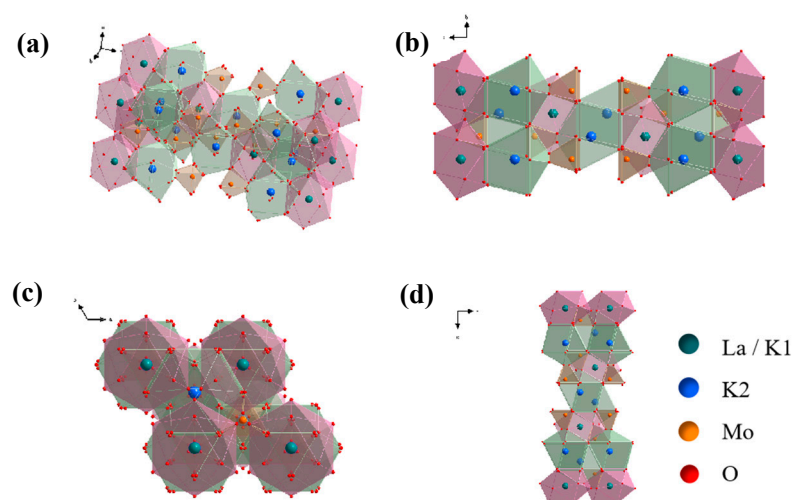

Figure.S1 Schematic diagram of  $K_5La(MoO_4)_4$  crystal structure from different views (a) normal, (b) a axis, (c) b axis, (d) c axis.

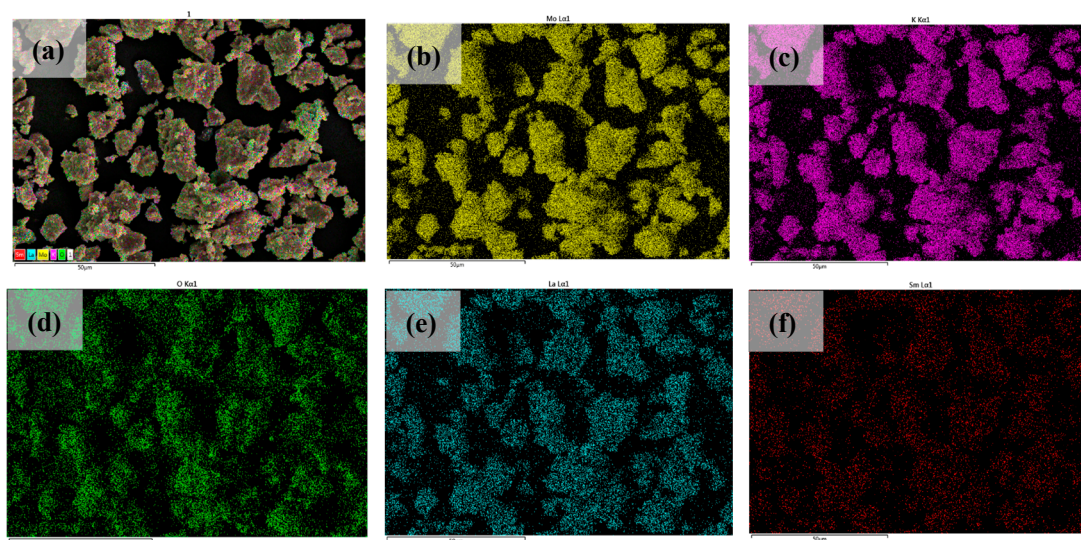

Figure. S2 The Mapping patterns of  $K_5La_{0.93}(MoO_4)_4: 0.07Sm^{3+}$  sample: entirety (a), Mo (b), K (c), O (d), La (e), Sm (f)

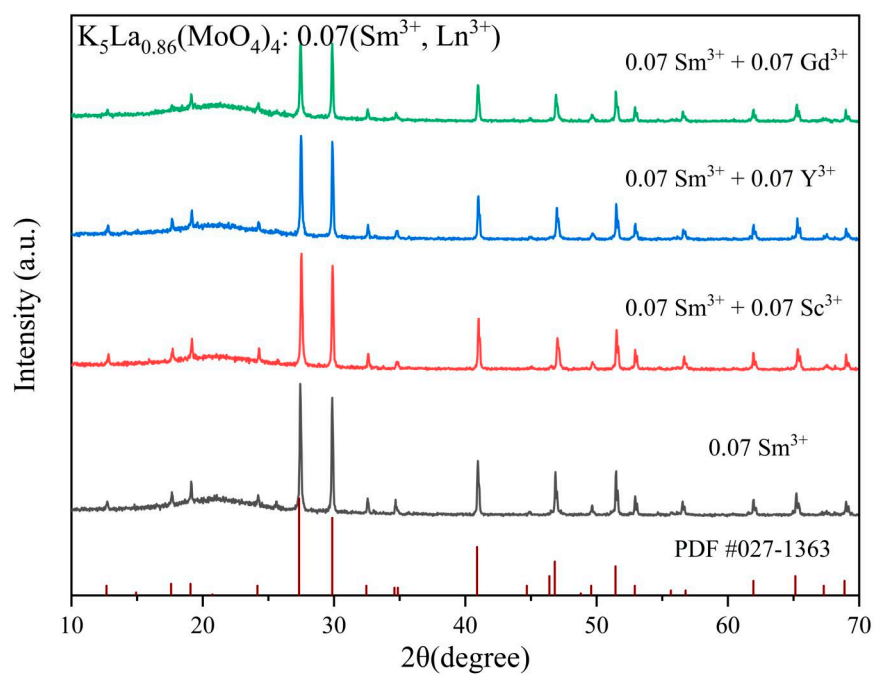

Figure. S3 The XRD pattern of  $\text{K}_5\text{La}_{0.86}(\text{MoO}_4)_4: 0.07(\text{Sm}^{3+}, \text{Ln}^{3+})$  phosphors

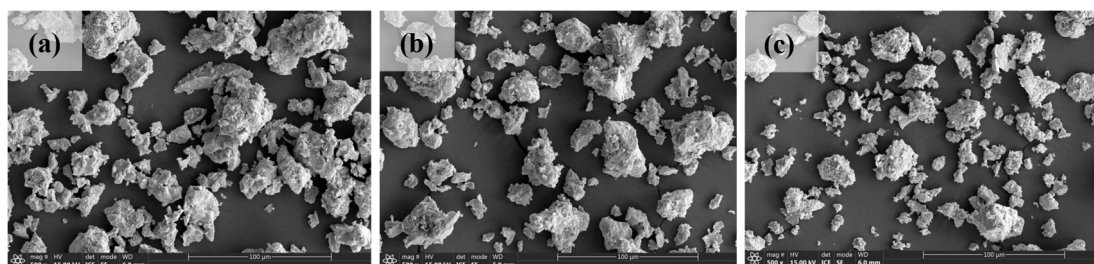

Figure. S4 The SEM photos of  $\text{K}_5\text{La}_{0.86}(\text{MoO}_4)_4: 0.07\text{Sm}^{3+}, 0.07\text{Ln}^{3+}$  ( $\text{Ln} = \text{Sc}$  (a),  $\text{Y}$  (b) and  $\text{Gd}$  (c)) phosphors.

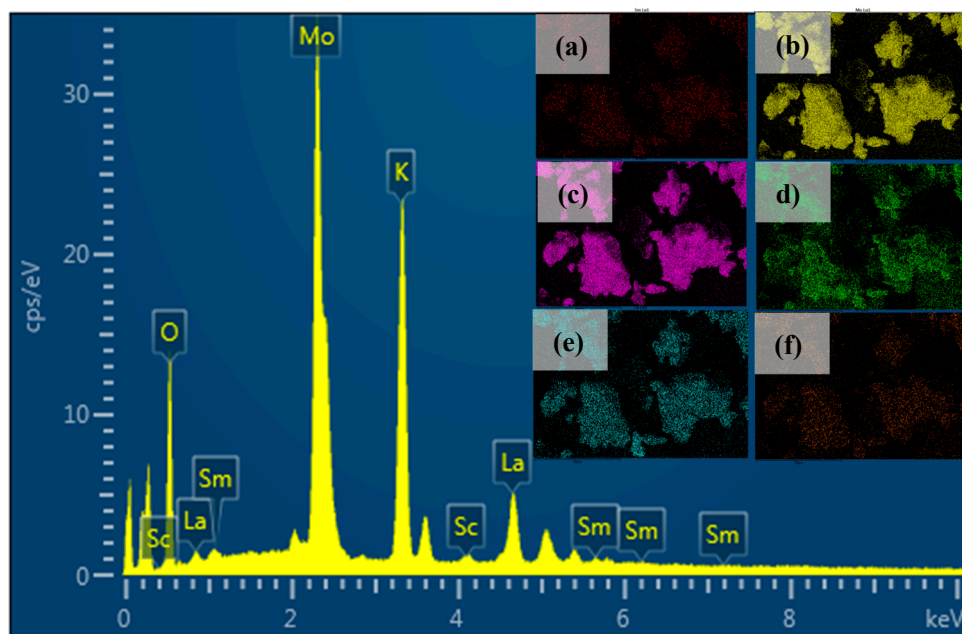

Figure. S5 The EDS and Mapping patterns of  $\text{K}_5\text{La}_{0.86}(\text{MoO}_4)_4: 0.07(\text{Sm}^{3+}, \text{Sc}^{3+})$  phosphors (inset a-f): Sm (a), Mo (b), K (c), O (d), La (e), Sc (e).

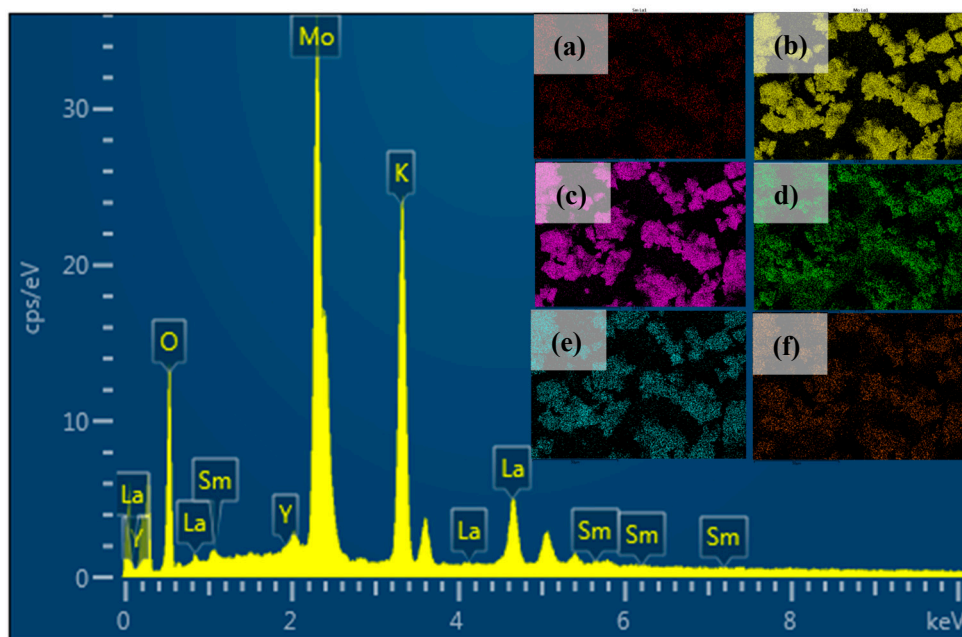

Figure. S6 The EDS and Mapping patterns of  $\text{K}_5\text{La}_{0.86}(\text{MoO}_4)_4: 0.07(\text{Sm}^{3+}, \text{Y}^{3+})$  phosphors (insets a-f): Sm (a), Mo (b), K (c), O (d), La (e), Y (e).



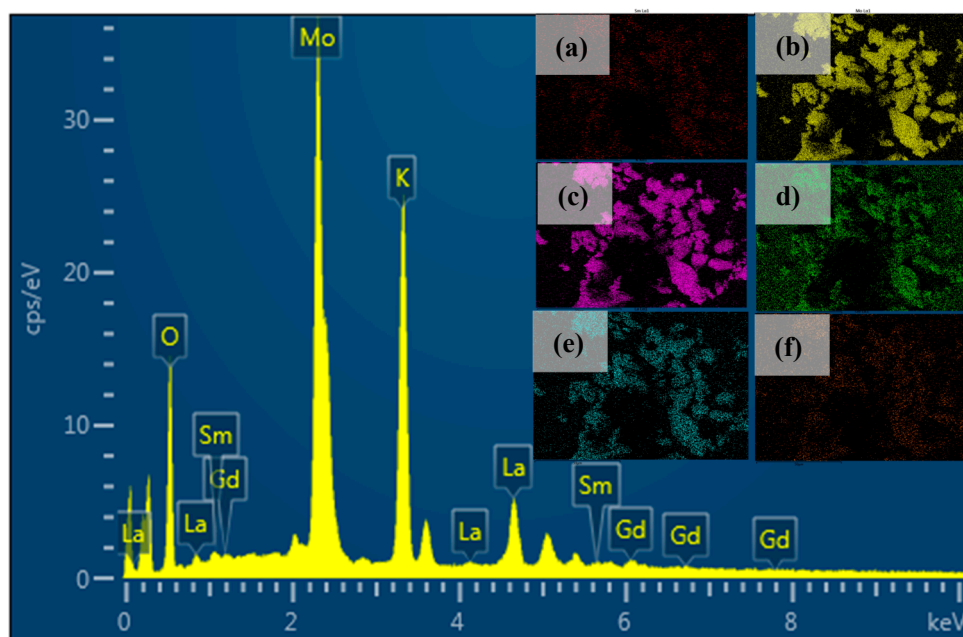

Figure. S7 The EDS and Mapping patterns of  $K_5La_{0.86}(MoO_4)_4: 0.07(Sm^{3+}, Gd^{3+})$  phosphors (insets a-f): Sm (a), Mo (b), K (c), O (d), La (e), Gd (e).

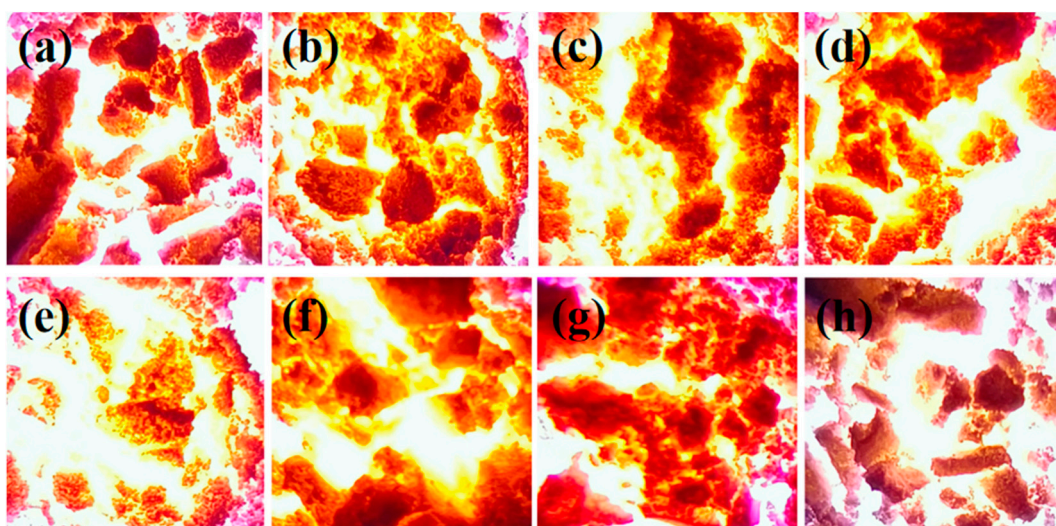

Figure.S8 Actual fluorescence photos of  $K_5La_{1-x}(MoO_4)_4: xSm^{3+}$ ,  $x= 0.005$  (a),  $0.01$  (b),  $0.03$  (c),  $0.05$  (d),  $0.07$  (e),  $0.10$  (f),  $0.20$  (g) and  $0.40$  (h).

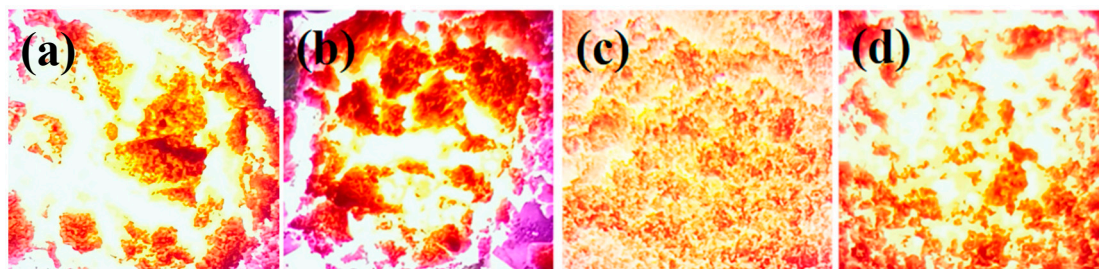

Figure.S9 Actual fluorescence photos of  $K_5La_{0.86}(MoO_4)_4: 0.07Sm^{3+}, 0.07Ln^{3+}$  ( $Ln = Sc, Y$  and  $Gd$ ) phosphors: Sm (a), Sm+Sc (b), Sm+Y(c) and Sm+Gd (d).
